# Supplementary material for: Characterization of a Chitin Synthase Encoding Gene and Effect of Diflubenzuron in Soybean Aphid, Aphis Glycines
Source: PubMed Central journal article supplement — Int J Biol Sci. 2012 Oct 25;8(10):1323–34. doi: 10.7150/ijbs.4189 (PMC3492791; doi:10.7150/ijbs.4189), 2012-10-25

## Supplementary Material

**Table S1.** Chitin synthase genes characterized in various insects

| Insect sp.                       | Gene              | Reference (s) |
|----------------------------------|-------------------|---------------|
| <i>Aedes aegypti</i>             | <i>CHS2</i>       | [9]           |
| <i>Anopheles gambiae</i>         | <i>CHS1, CHS2</i> | [8]           |
| <i>Anopheles quadrimaculatus</i> | <i>CHS1</i>       | [14]          |
| <i>Choristoneura fumiferana</i>  | <i>CHS1</i>       | [60]          |
| <i>Diabrotica Virgifera</i>      | <i>CHS2</i>       | [57]          |
| <i>Drosophila melanogaster</i>   | <i>CHS1, CHS2</i> | [10]          |
| <i>Ectropis obliqua</i>          | <i>CHS1</i>       | [58]          |
| <i>Laodelphax striatellus</i>    | <i>CHS1</i>       | [35]          |
| <i>Locusta migratoria</i>        | <i>CHS1, CHS2</i> | [34, 36]      |
| <i>Lucilia cuprina</i>           | <i>CHS1</i>       | [7]           |
| <i>Mamestra brassicae</i>        | <i>CHS1</i>       | [56]          |
| <i>Manduca sexta</i>             | <i>CHS1, CHS2</i> | [11-12]       |
| <i>Nilaparvata lugens</i>        | <i>CHS1</i>       | [35]          |
| <i>Ostrinia furnacalis</i>       | <i>CHS1, CHS2</i> | [47, 59]      |
| <i>Plutella xylostella</i>       | <i>CHS1</i>       | [39]          |
| <i>Spodoptera exigua</i>         | <i>CHS1, CHS2</i> | [54-55]       |
| <i>Spodoptera frugiperda</i>     | <i>CHS2</i>       | [53]          |
| <i>Tribolium castaneum</i>       | <i>CHS1, CHS2</i> | [13]          |

**Table S2.** Effect of DFB at different dosages on the *A. glycines*' survival

| Days after feeding | Cumulative percent mortality ( $\pm$ S.E) |                 |                  |
|--------------------|-------------------------------------------|-----------------|------------------|
|                    | 0 ppm (Control)                           | 5 ppm           | 50 ppm           |
| 1                  | 0.00 $\pm$ 0.00                           | 2.22 $\pm$ 0.02 | 2.22 $\pm$ 0.02  |
| 2                  | 1.11 $\pm$ 0.01                           | 4.44 $\pm$ 0.02 | 6.67 $\pm$ 0.03  |
| 3                  | 1.11 $\pm$ 0.01                           | 4.44 $\pm$ 0.02 | 11.11 $\pm$ 0.03 |
| 4                  | 2.22 $\pm$ 0.02                           | 4.44 $\pm$ 0.02 | 16.67 $\pm$ 0.04 |
| 5                  | 2.22 $\pm$ 0.02                           | 7.78 $\pm$ 0.03 | 20.00 $\pm$ 0.04 |
| 6                  | 5.56 $\pm$ 0.02                           | 8.89 $\pm$ 0.03 | 23.33 $\pm$ 0.05 |

**Figure S1.** Schematic diagram of the exon-intron organization of the *ApCHS* gene in *A. pisum* (LOC100162079, Aphidbase). Light-black boxes indicate exons and white boxes indicate introns. *ApCHS* is 12935 bp long and contains 20 exons (numbered 1-20).

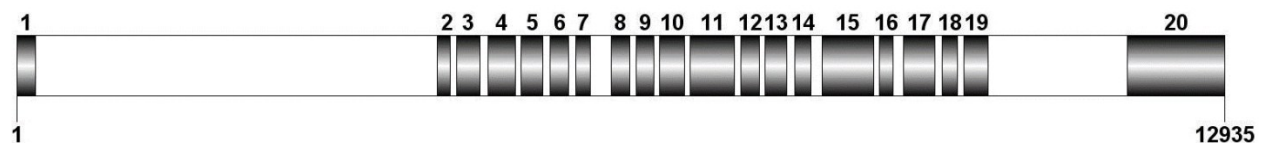

Supplement: ijbsv08p1323s1.pdf [file ijbsv08p1323s1.pdf]
